# Supplementary material for: Divalent metal ions modulated strong frustrated M(ii)–Fe(iii)3O (M = Fe, Mn, Mg) chains with metamagnetism only in a mixed valence iron complex
Source: Royal Society of Chemistry journal article supplement (doi:10.1039/c5cc05481h), 2015-01-01
Supplement: c5cc05481h1.pdf [file c5cc05481h1.pdf]

## *Supporting Information for*

# **Divalent Metal Ions Modulated Strong Frustrated M(II)-Fe(III)<sub>3</sub>O (M= Fe, Mn, Mg) Chains with Metamagnetism Only in Mixed Valence Iron Complex**

Qi-Long Wu,<sup>a</sup> Song-De Han,<sup>b</sup> Qing-Lun Wang,<sup>c</sup> Jiong-Peng Zhao,<sup>\*a</sup> Feng Ma,<sup>a</sup> Xue Jiang,<sup>b</sup> Fu-Chen Liu,<sup>\*a</sup> and Xian-He Bu<sup>\*b</sup>

<sup>a</sup> School of Chemistry and Chemical Engineering, Tianjin University of Technology, TKL of Organic Solar Cells and Photochemical Conversion, Tianjin 300384, P.R. China.

<sup>b</sup> TKL of Metal- and Molecule-Based Material Chemistry, and Collaborative Innovation Center of Chemical Science and Engineering (Tianjin), Nankai University, Tianjin 300071, P.R. China.

<sup>c</sup> Department of Chemistry, Nankai University, Tianjin 300071, P.R. China.

\* Corresponding author. Fax: (+86) 22-23502458. E-mail: horryzhao@yahoo.com, fuchenliutj@yahoo.com and buxh@nankai.edu.cn

## **Experimental Section**

**Materials and methods.** All chemicals were reagent grade and used as purchased without further purification. The XRPD spectra were recorded on a Rigaku D/Max-2500 diffractometer at 40 kV, 100 mA for a Cu-target tube and a graphite monochromator. Simulation of the XRPD spectrum was carried out by the single-crystal data and diffraction-crystal module of the Mercury (Hg) program available free of charge *via* the internet at <http://www.iucr.org>. Elemental analyses of C, H and N were performed on a Perkin-Elmer 240C analyzer. UV-vis spectra were recorded on a VarianCary5000spectrophotometer. Magnetic susceptibility was measured by a Quantum Design MPMS superconducting quantum interference device (SQUID). Diamagnetic corrections were estimated by using Pascal constants and background corrections by experimental measurement on sample holders.

**X-ray Crystallography.** The single-crystal X-ray diffraction data of **1**, **2** and **3** were collected on a Rigaku SCX-mini diffractometer at 293(2) K. The program *CrystalClear*<sup>S1</sup> was used for the integration of the diffraction profiles. The structure was solved by direct method using the SHELXS program of the SHELXTL package and refined by full-matrix least-squares methods with SHELXL (semi-empirical absorption corrections were applied by using the SADABS program).<sup>S2</sup> The non-hydrogen atoms were

located in successive difference Fourier syntheses and refined with anisotropic thermal parameters on  $F^2$ . All hydrogen atoms were generated theoretically at the specific atoms and refined isotropically with fixed thermal factors. The selected bond lengths and angles are given in Tables S1.

## References

- S1. G. M. Sheldrick, *SHELXL97, Program for Crystal Structure Refinement*; University of Göttingen: Göttingen, Germany, 1997.  
 S2. CrystalClear and CrystalStructure; Rigaku/MSK: The Woodlands, TX, 2005.

**Table S1.** Selected bond lengths [Å] for **1 - 3**.

| <b>1</b>              |           | <b>2</b>               |            | <b>3</b>              |             |
|-----------------------|-----------|------------------------|------------|-----------------------|-------------|
| Fe1—O3 <sup>ii</sup>  | 2.123 (6) | Fe1—O1                 | 1.947 (11) | Fe1—O1                | 2.060 (2)   |
| Fe1—O3                | 2.123 (6) | Fe1—O13                | 2.017 (14) | Fe1—O12               | 2.060 (2)   |
| Fe1—O1                | 2.128 (6) | Fe1—O20                | 2.019 (12) | Fe1—O14               | 2.060 (2)   |
| Fe1—O1 <sup>ii</sup>  | 2.128 (6) | Fe1—O8                 | 2.019 (14) | Fe1—O2                | 2.060 (2)   |
| Fe1—O1W               | 2.160 (6) | Fe1—O7                 | 2.032 (14) | Fe1—O11               | 2.060 (2)   |
| Fe1—O1W <sup>ii</sup> | 2.160 (6) | Fe1—O10                | 2.052 (13) | Fe1—O4                | 2.060 (2)   |
| Fe2—O19               | 1.905 (6) | Fe2—O1                 | 1.941 (10) | Fe2—O1                | 1.917 (2)   |
| Fe2—O11               | 2.025 (7) | Fe2—O11                | 2.022 (13) | Fe2—O5                | 2.004 (3)   |
| Fe2—O2 <sup>iii</sup> | 2.029 (6) | Fe2—O12                | 2.037 (13) | Fe2—O3                | 2.020 (3)   |
| Fe2—O9                | 2.034 (7) | Fe2—O2                 | 2.045 (13) | Fe2—O6                | 2.027 (3)   |
| Fe2—O7                | 2.053 (6) | Fe2—O5                 | 2.047 (13) | Fe2—O16               | 2.028 (2)   |
| Fe2—O6                | 2.064 (7) | Fe2—O17                | 2.052 (12) | Fe2—O8                | 2.041 (3)   |
| Fe3—O19               | 1.938 (6) | Fe3—O1                 | 1.886 (11) | Fe3—O1                | 1.903 (2)   |
| Fe3—O17               | 2.016 (6) | Fe3—O9                 | 2.013 (12) | Fe3—O10               | 2.020 (3)   |
| Fe3—O10               | 2.018 (7) | Fe3—O6                 | 2.034 (13) | Fe3—O19 <sup>i</sup>  | 2.023 (3)   |
| Fe3—O13               | 2.030 (7) | Fe3—O14                | 2.040 (12) | Fe3—O13               | 2.025 (3)   |
| Fe3—O16               | 2.030 (6) | Fe3—O3                 | 2.043 (13) | Fe3—O7                | 2.038 (2)   |
| Fe3—O12               | 2.034 (7) | Fe3—O4                 | 2.056 (12) | Fe3—O9                | 2.054 (2)   |
| Fe4—O19               | 1.946 (6) | Mn1—O16 <sup>ii</sup>  | 2.193 (12) | Mg1—O17 <sup>ii</sup> | 2.074 (2)   |
| Fe4—O14               | 2.016 (7) | Mn1—O16 <sup>iii</sup> | 2.193 (12) | Mg1—O17               | 2.074 (2)   |
| Fe4—O15               | 2.033 (6) | Mn1—O15                | 2.208 (12) | Mg1—O18 <sup>ii</sup> | 2.084 (2)   |
| Fe4—O8                | 2.034 (6) | Mn1—O15 <sup>iv</sup>  | 2.208 (12) | Mg1—O18               | 2.084 (2)   |
| Fe4—O4                | 2.048 (7) | Mn1—O1W                | 2.222 (12) | Mg1—O1W               | 2.098 (3)   |
| Fe4—O5                | 2.062 (6) | Mn1—O1W <sup>iv</sup>  | 2.222 (12) | Mg1—O1W <sup>ii</sup> | 2.098 (3)   |
| Fe2—O19—Fe3           | 120.3 (3) | Fe3—O1—Fe2             | 121.3 (6)  | Fe3—O1—Fe2            | 120.79 (11) |
| Fe2—O19—Fe4           | 120.4 (3) | Fe3—O1—Fe1             | 120.5 (5)  | Fe3—O1—Fe1            | 119.54 (12) |
| Fe3—O19—Fe4           | 119.2 (3) | Fe2—O1—Fe1             | 118.1 (5)  | Fe2—O1—Fe1            | 119.61 (11) |

<sup>ii</sup>  $-x+1, -y+1, -z$ ; <sup>iii</sup>  $x-1, y-1, z$ .  
<sup>ii</sup>  $-x+1, -y, -z$ ; <sup>iii</sup>  $x-1, y-1, z$ ;  
<sup>iv</sup>  $-x, -y-1, -z$ .

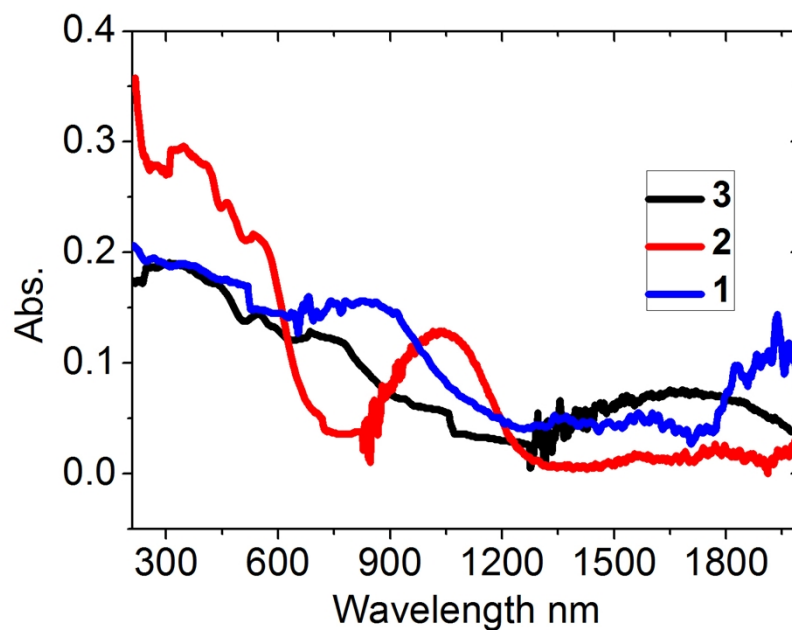

**Fig. S1** The UV spectrum for 1-3.

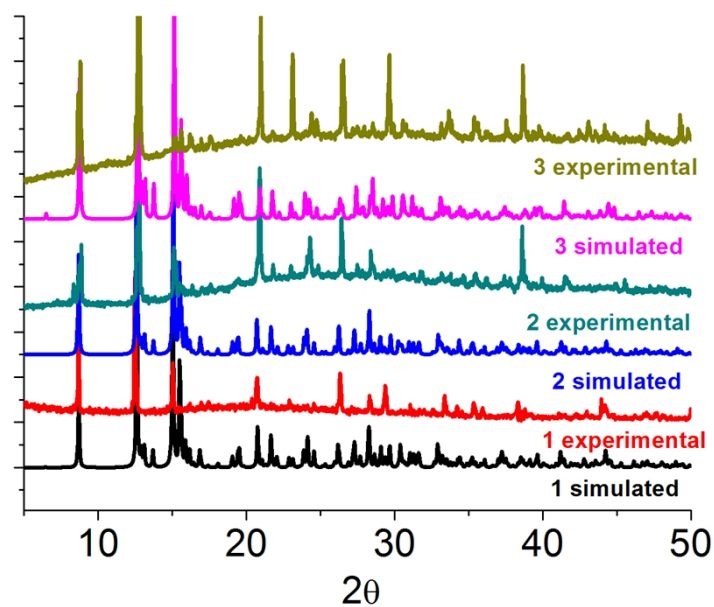

**Fig. S2** Powder X-ray diffraction pattern of 1-3.

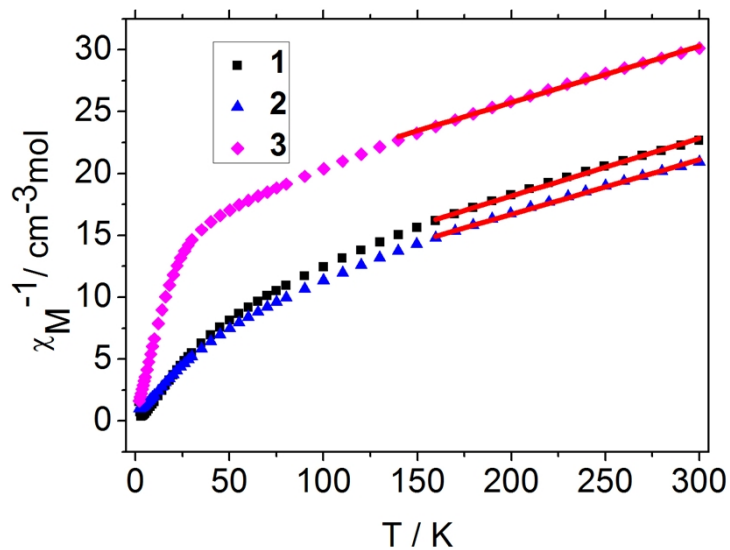

**Fig. S3**  $\chi_M^{-1}$  vs.  $T$  plots of **1**, **2** and **3**. The red lines are the fitting by the Curie–Weiss law.

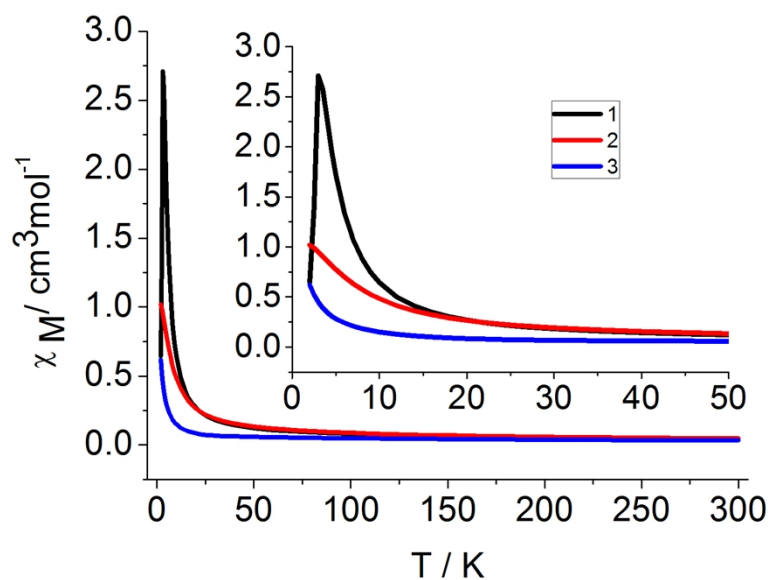

**Fig. S4** The  $\chi_M$  vs.  $T$  plots of **1**, **2** and **3**.

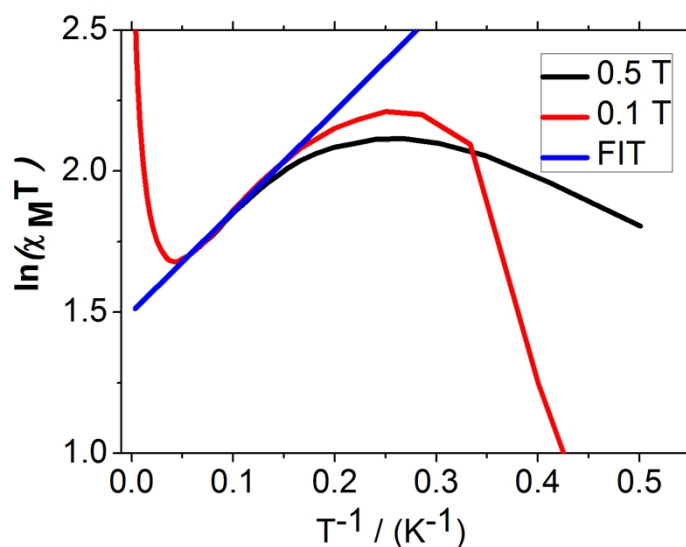

**Fig. S5** Logarithm of  $\chi_M T$  vs.  $1/T$  plot of **1**. The blue line is the result of fitting by  $\chi_M T = C_{eff} \exp(\Delta/k_B T)$  between 20 K and 8 K with the energy gap of  $\Delta/k_B = 3.38$  K and  $C_{eff} = 4.51$  cm<sup>3</sup> mol<sup>-1</sup> K.

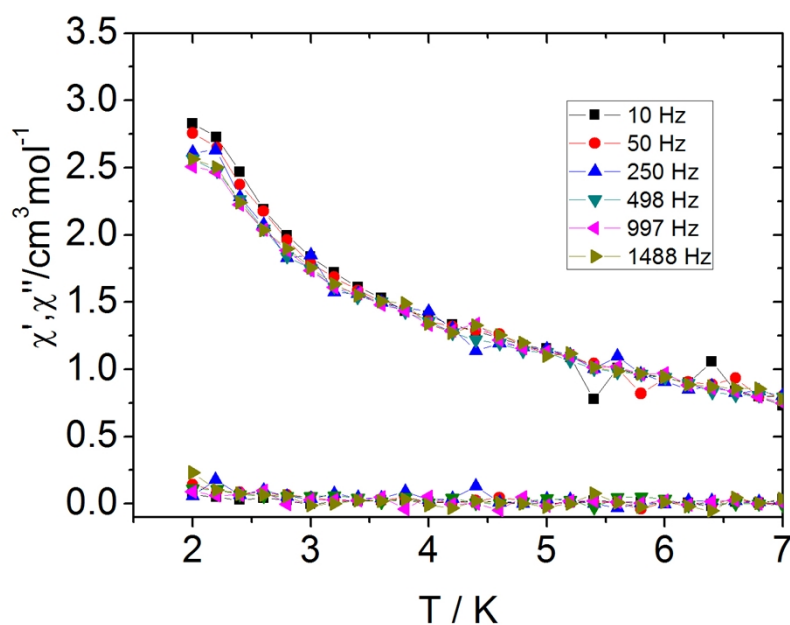

**Fig. S6** AC plot for **1** between 2 K and 7 K at different frequencies under a DC field of 0.4 T.
